# Supplementary material for: Chemiluminometric determination of reserpine and related alkaloids
Source: Royal Society of Chemistry journal article supplement (doi:10.1039/b001430n), 2000-01-01
Supplement: reserpine-esi-figures.doc [file reserpine-esi-figures.doc]

Schematic diagram of batch (upper) and flow injection (lower) chemiluminometer used (not to scale) (PMT: photomultiplier, H.V.: high voltage power supply, I/V: current to voltage converter)

Effect of concentration of potassium permanganate at (1) 1.5, (2) 2.5, (3) 5.0, (4) 10, (5) 20, (6) 30 and (7) 50 g l-1 PPA on the emission intensity from 0.750 (upper diagram) and 5.00 (lower diagram) μg ml-1 of RES by using the batch chemiluminometer.
